# Supplementary material
Source: publisher figshare collection journal article supplement (https://acs.figshare.com/ndownloader/files/4645072)
Supplement: Supplementary file 1 [file 4645072]

Supporting information to “Simplified speciation and improved phosphodiesterolytic activity of hydroxo complexes of trivalent lanthanides in aqueous DMSO” by Irma Sánchez-Lombardo and Anatoly K. Yatsimirsky

**Table 1S.** Results of potentiometric titrations of lanthanides in 80% vol DMSO. The mean values of  $\log\beta_{pq}$  are given with standard errors calculated by averaging of  $\beta$  values obtained in independent titration experiments. Errors in  $\log\beta_{pq}$  values as fitting parameters in each titration experiment were less than  $\pm 0.05$ .

Titrations in the presence of 0.01 M NaClO<sub>4</sub>

| [La(ClO <sub>4</sub> ) <sub>3</sub> ], mM | sigma <sup>a</sup> | log $\beta_{pq}$  |                   |                  |
|-------------------------------------------|--------------------|-------------------|-------------------|------------------|
|                                           |                    | 2-1               | 1-1               | 1-3              |
| 0.5                                       | 3.07               | -5.48             | -8.59             | -28.48           |
| 1.0                                       | 3.58               | -5.68             | -8.74             | -28.61           |
| 1.5                                       | 4.0                | -5.80             | -8.44             | -28.03           |
| <b>mean</b>                               |                    | <b>-5.65±0.09</b> | <b>-8.59±0.09</b> | <b>-28.4±0.2</b> |

for an alternative model with binuclear species:

| [La(ClO <sub>4</sub> ) <sub>3</sub> ], mM | sigma <sup>a</sup> | 2-1               | 2-2              | 2-6              |
|-------------------------------------------|--------------------|-------------------|------------------|------------------|
|                                           |                    |                   |                  |                  |
| 0.5                                       | 5.05               | -5.11             | -13.61           | -54.02           |
| 1.0                                       | 7.3                | -5.38             | -14.15           | -53.76           |
| 1.5                                       | 6.49               | -5.4              | -13.78           | -52.36           |
| <b>mean</b>                               |                    | <b>-5.30±0.09</b> | <b>-13.8±0.2</b> | <b>-53.4±0.5</b> |

| [Eu(ClO <sub>4</sub> ) <sub>3</sub> ], mM | sigma <sup>a</sup> | 2-1             | 1-1               | 1-3              |
|-------------------------------------------|--------------------|-----------------|-------------------|------------------|
|                                           |                    |                 |                   |                  |
| 0.5                                       | 0.60               | - <sup>b</sup>  | -8.13             | -24.55           |
| 1.0                                       | 1.39               | -5.10           | -8.28             | -25.83           |
| 1.5                                       | 4.02               | -5.00           | -8.2              | -24.64           |
| 2.0                                       | 2.62               | -4.63           | -8.22             | -25.21           |
| <b>mean</b>                               |                    | <b>-4.9±0.1</b> | <b>-8.21±0.03</b> | <b>-25.1±0.3</b> |

for alternative model with binuclear species:

| [Eu(ClO <sub>4</sub> ) <sub>3</sub> ], mM | sigma | 2-1   | 2-2              | 2-6              |
|-------------------------------------------|-------|-------|------------------|------------------|
|                                           |       |       |                  |                  |
| 0.5                                       | 5.08  |       | -10.69           | -45.99           |
| 1.0                                       | 2.44  |       | -13.12           | -48.56           |
| 1.5                                       | 2.82  |       | -12.39           | -46.15           |
| 2.0                                       | 3.34  | -6.31 | -12.94           | -47.77           |
| <b>mean</b>                               |       |       | <b>-12.3±0.6</b> | <b>-47.1±0.6</b> |

Titrations in the absence of added NaClO<sub>4</sub>

| [La(ClO <sub>4</sub> ) <sub>3</sub> ], mM | sigma <sup>a</sup> | 2-1   | 1-1   | 1-2    | 1-3    |
|-------------------------------------------|--------------------|-------|-------|--------|--------|
|                                           |                    |       |       |        |        |
| 0.5                                       | 5.0                | -5.70 | -8.87 | -19.20 | -29.66 |
| 1.0                                       | 6.65               | -5.4  | -8.97 | -19.02 | -29.42 |
| 1.5                                       | 14.9               | -6.04 | -9.39 | -19.33 | -29.58 |

|                                              |                          |                 |                  |                    |                                |
|----------------------------------------------|--------------------------|-----------------|------------------|--------------------|--------------------------------|
| <b>mean</b>                                  |                          | <b>-5.7±0.2</b> | <b>-9.1±0.1</b>  | <b>-19.18±0.09</b> | <b>-29.55±0.07</b>             |
| <b>[Nd(ClO<sub>4</sub>)<sub>3</sub>], mM</b> | <b>sigma<sup>a</sup></b> | <b>2-1</b>      | <b>1-1</b>       | <b>1-2</b>         | <b>1-3</b>                     |
| 0.5                                          | 10.15                    | - <sup>b</sup>  | -8.05            | -17.31             | -26.19                         |
| 0.8                                          | 6.45                     | -5.20           | -8.80            | -18.90             | -27.80                         |
| 1.0                                          | 8.11                     | -5.82           | -8.22            | - <sup>b</sup>     | -27.55                         |
| 1.0                                          | 3.47                     | -5.55           | -8.34            | -17.69             | -27.65                         |
| 1.5                                          | 12                       | -5.23           | -8.54            | -17.80             | -27.56                         |
| <b>mean</b>                                  |                          | <b>-5.5±0.1</b> | <b>-8.5±0.1</b>  | <b>-17.9±0.3</b>   | <b>-27.64±0.06<sup>c</sup></b> |
| <b>[Eu(ClO<sub>4</sub>)<sub>3</sub>], mM</b> | <b>sigma<sup>a</sup></b> | <b>1-1</b>      | <b>1-2</b>       | <b>1-3</b>         |                                |
| 1.0                                          | 3.32                     | -7.60           | -16.13           | -24.60             |                                |
| 1.0                                          | 12.38                    | -7.70           | -15.69           | -24.46             |                                |
| 1.2                                          | 9.00                     | -7.90           | -16.2            | -24.22             |                                |
| 2.0                                          | 3.39                     | -7.36           | -15.12           | -23.62             |                                |
| <b>mean</b>                                  |                          | <b>-7.6±0.1</b> | <b>-15.8±0.2</b> | <b>-24.2±0.2</b>   |                                |

<sup>a</sup> Goodness of fit is measured in Hyperquad by *sigma*, the value of the scaled sum of squares, which is given in the table together with log $\beta_{pq}$  values for each titration. When *sigma* is close to 1 it can be said that the data has been fitted within experimental error. However, even with large *sigma* values the fitting quality may be still acceptable. Thus with *sigma* equal e.g. 20 the program typically calculates the fitting parameters with errors less than 0.05 in the logarithmic scale (the relative error  $\pm 10\%$ ). In addition the *sigma* value depends on weighting scheme, which in Hyperquad is automatic and ignores any systematic errors. It seems therefore difficult to assign a definite meaning to the absolute value of *sigma*, but this parameter is certainly appropriate for comparison of fitting qualities to different models.

<sup>b</sup> Hyperquad assigned “excessive” or “negative” value to respective  $\beta$ , which was ignored in the calculation of the mean value.

<sup>c</sup> The value -26.19 excluded.

**Table 2S.** Mean values of hydrolysis constants of trivalent lanthanides in 80% vol. DMSO at 25°C obtained by joint fitting of all titration plots for each cation and respective sigma values calculated by Hyperquad.

| Species                                | log $\beta_{pq}$        |             |             |                             |            |
|----------------------------------------|-------------------------|-------------|-------------|-----------------------------|------------|
|                                        | [NaClO <sub>4</sub> ]=0 |             |             | [NaClO <sub>4</sub> ]=10 mM |            |
|                                        | La(III)                 | Nd(III)     | Eu(III)     | La(III)                     | Eu(III)    |
| <b>Ln<sub>2</sub>(OH)<sup>5+</sup></b> | -5.85±0.11              | -5.26±0.12  |             | -5.76±0.12                  | -4.76±0.08 |
| <b>Ln(OH)<sup>2+</sup></b>             | -9.36±0.07              | -8.43±0.04  | -7.76±0.03  | -8.55±0.03                  | -7.83±0.02 |
| <b>Ln(OH)<sub>2</sub><sup>+</sup></b>  | -19.22±0.06             | -17.83±0.08 | -16.07±0.02 |                             |            |
| <b>Ln(OH)<sub>3</sub></b>              | -29.56±0.03             | -28.3±0.2   | -24.80±0.02 | -28.21±0.03                 | -24.7±0.02 |
| <b>sigma</b>                           | 20.86                   | 13.8        | 25.0        | 11.91                       | 18.4       |

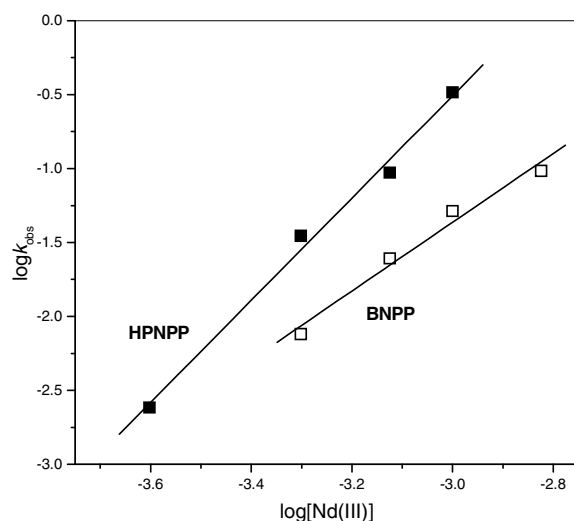

Fig. S1. Observed first-order rate constants for the hydrolysis of BNPP (open squares) and HPNPP (solid squares) by  $\text{Nd}(\text{ClO}_4)_3$  at variable concentrations of  $\text{Nd}(\text{ClO}_4)_3$  and  $\text{Me}_4\text{NOH}$  taken at the constant ratio  $[\text{La}(\text{III})]:[\text{OH}^-]=1:2$  in 80% vol. DMSO at  $25^\circ\text{C}$ .

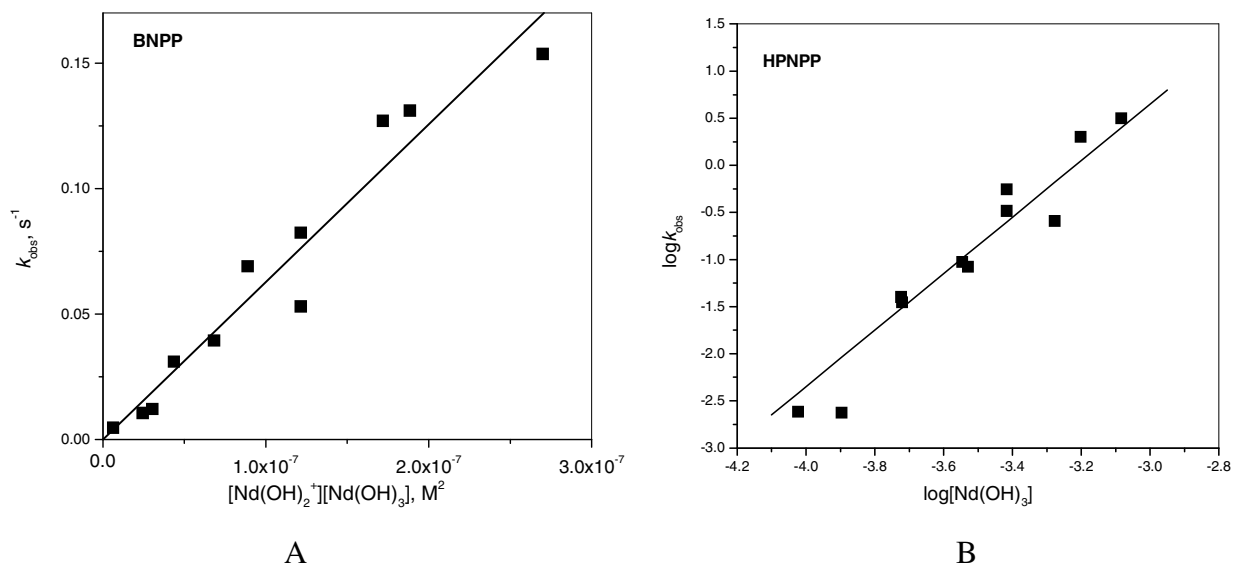

Fig. S2. Observed first-order rate constants for the hydrolysis of BNPP (A) and HPNPP (B) by  $\text{Nd}(\text{ClO}_4)_3$  in 80% vol. DMSO at  $25^\circ\text{C}$  as a function of calculated concentrations of  $\text{Nd}(\text{OH})_2^+$  and  $\text{Nd}(\text{OH})_3$  in accordance with kinetic equations (6) and (7) respectively. The slope of the line in (A) equals  $k_3$  and the slope of the line in (B) equals 3.

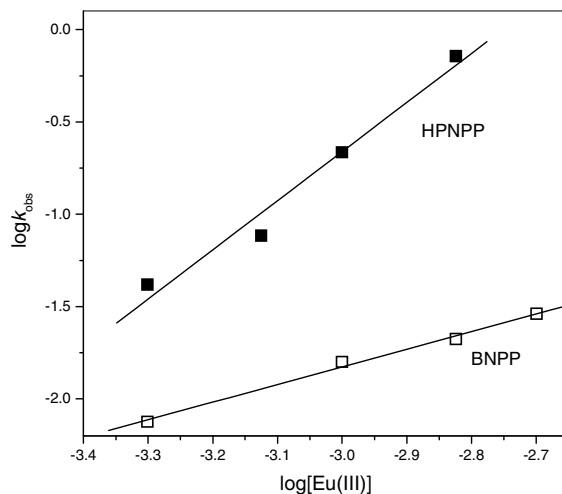

Fig. S3. Observed first-order rate constants for the hydrolysis of BNPP (open squares) and HPNPP (solid squares) by  $\text{Eu}(\text{ClO}_4)_3$  at variable concentrations of  $\text{Eu}(\text{ClO}_4)_3$  and  $\text{Me}_4\text{NOH}$  taken at the constant ratio  $[\text{Eu(III)}]:[\text{OH}^-]=1:2$  in 80% vol. DMSO at 25°C.

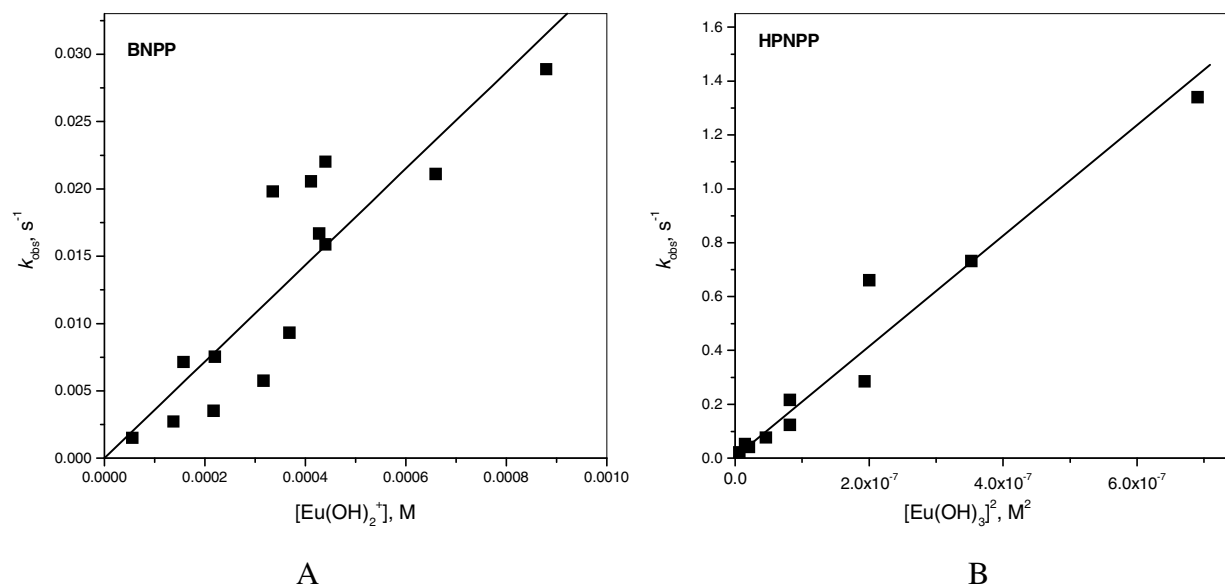

Fig. S4. Observed first-order rate constants for the hydrolysis of BNPP (A) and HPNPP (B) by  $\text{Eu}(\text{ClO}_4)_3$  in 80% vol. DMSO at 25°C as a function of calculated concentrations of  $\text{Eu}(\text{OH})_2^+$  and  $[\text{Eu}(\text{OH})_3]^2$  respectively. The slope of the line in (A) approximately equals  $k_2$  (see equation (8)) and the slope of the line in (B) equals  $k_3$  (see equation (9)).
